# Supplementary material for: Transgenic Expression of A Venous Malformation Related Mutation, TIE2-R849W, Significantly Induces Multiple Malformations of Zebrafish
Source: PubMed Central journal article supplement — Int J Med Sci. 2018 Feb 12;15(4):385–94. doi: 10.7150/ijms.23054 (PMC5835709; doi:10.7150/ijms.23054), 2018-02-12
Supplement: ijmsv15p0385s1.pdf [file ijmsv15p0385s1.pdf]

**Table S1** Coding sequences of primers involved in construction of humanized *TIE2-R849W* plasmid vector

| <b>Primer Name</b>    | <b>Coding Sequence</b>                          |
|-----------------------|-------------------------------------------------|
| TIE2-over (pcDNA3)    |                                                 |
| Forward               | 5'-GAGACCCAAGCTTGGTACCG-3'                      |
| Reverse               | 5'-AGAGTCCATGGTGGCCCTATAGTGAGTCGTATTAA-3'       |
| TIE2-IF-1 (CDS)       |                                                 |
| Forward               | 5'-GCCACCATGGACTCTTTAGCCAGCTT-3'                |
| Reverse               | 5'-ATCAGCGAGCTCTAGCTAGGCCGCTTCTTCAGCAG-3'       |
| TIE2-IF-2 (BGH polyA) |                                                 |
| Forward               | 5'-CTAGAGCTCGCTGATCAGCC-3'                      |
| Reverse               | 5'-CCAAGCTTGGGTCTCTCCCCAGCATGCCTGCTATT-3'       |
| TIE2-R849W-over       |                                                 |
| Forward               | 5'-CTCCTTCACTTCGCTGCCGACGTGGCCCCGG-3'           |
| Reverse               | 5'-CGGTATGCCTTCTCTCTCACACTGGAGCCC-3'            |
| TIE2-R849W-insite     |                                                 |
| Forward               | 5'-AGAGAAGGCATACCGAGGATGACCCCAAAGATAGT-3'       |
| Reverse               | 5'-AGCGAAGTGAAGGAGATGATGGGAGGACAGTGTGGACGCGG-3' |
| TIE2-R849W            |                                                 |
| Forward               | 5'-AAGAAGGATGGGTTATGGATGGATGCTGCCATCAA-3'       |
| Reverse               | 5'-TAACCCATCCTTCTTGATGCGCGCCTTAAG-3'            |

**Table S2** Coding sequences of primers involved in real-time qPCR

| <b>Gene Name</b> | <b>Primer Sequence</b>         |
|------------------|--------------------------------|
| pik3r2           |                                |
| Forward          | 5'-GAGGAAGCTAAGGGACCAATATC-3'  |
| Reverse          | 5'-GTCGTCCAGCAGAGAATAGAAG -3'  |
| foxo1b           |                                |
| Forward          | 5'-CTACGAGTGGATGGTGAAGAG-3'    |
| Reverse          | 5'-TTCCCTGTTCTTCATTCTGG-3'     |
| cd146            |                                |
| Forward          | 5'-GCGTGCTCTATTACCTCTACAAG-3'  |
| Reverse          | 5'-ACAGCCTCTTCAGATTTACCG-3'    |
| nr2f1a           |                                |
| Forward          | 5'-TCCTATTGACCAACACCATCG-3'    |
| Reverse          | 5'-GGATCCCCATTCGTTAGCG-3'      |
| s1pr1            |                                |
| Forward          | 5'-TCATTACTGCAGGATTACGCG-3'    |
| Reverse          | 5'-GCAAGGTTTTCTCAAGTCAGG-3'    |
| egf17            |                                |
| Forward          | 5'-GTGGAGAACGTTACTGAAGAGG-3'   |
| Reverse          | 5'-ATTGGTTCGCTCAGACAGG-3'      |
| bmp4             |                                |
| Forward          | 5'-CCAACACCGTGAGAGGATTC-3'     |
| Reverse          | 5'-CCTGTTTGATCTGGGTCTGAG-3'    |
| wnt8a            |                                |
| Forward          | 5'-CTCTACTCACAAAGGCTTGAGAA-3'  |
| Reverse          | 5'-CAAGACTGCAGTTTCTGGTTAAAG-3' |
| wnt9a            |                                |
| Forward          | 5'-CGCTACAAAATGCTGGATGG-3'     |
| Reverse          | 5'-TCAGTGGCAGAATGGACAG-3'      |
| lrp5             |                                |
| Forward          | 5'-GCTCCTCTCTATGACCGAAAC-3'    |
| Reverse          | 5'-ACGGGCTGTTGGATGAATAA-3'     |
| lrp6             |                                |
| Forward          | 5'-TGAGGTGCTGTTCTTCAGTAATC-3'  |
| Reverse          | 5'-GTTGGAGTCCTCGATCACAATC-3'   |
| frzb             |                                |

|           |                                   |
|-----------|-----------------------------------|
| Forward   | 5'-TCCGGCTGTCTGTGTCCTCCGCTCAC-3'  |
| Reverse   | 5'-GTCCTCCTCCCGTTTGCAGCCTGGTC-3'  |
| fzd7a     |                                   |
| Forward   | 5'-CCCGCCACTATCGTGATCGCCTGCTA-3'  |
| Reverse   | 5'-CCGCGTAACAGTCCGCACGAGACATTC-3' |
| fzd7b     |                                   |
| Forward   | 5'-CGAGCGCAAAGGAGGCAGAT-3'        |
| Reverse   | 5'-CTGGCGCGTACATGGAGCAGA-3'       |
| β-catenin |                                   |
| Forward   | 5'-ATCATGCGCTCCCCACAGATGGTA-3'    |
| Reverse   | 5'-GCCTCCGCTGGCCAGAATGATAAG-3'    |
| gsk-3β    |                                   |
| Forward   | 5'-ATCTTAATCCCCGCTCATGC-3'        |
| Reverse   | 5'-CAGGTTGAGGTGTTAGAGGC-3'        |
| axin1     |                                   |
| Forward   | 5'-GACATGGAGAGGAACCAGAAG-3'       |
| Reverse   | 5'-ATGACCCTGAGCTTTCTTGG-3'        |
| axin2     |                                   |
| Forward   | 5'-CTTACCCTCGGACACTTCAAG-3'       |
| Reverse   | 5'-CCCTCATAATTGGCAGAACTG-3'       |
| COX2      |                                   |
| Forward   | 5'-CCTTCCGGCCATCATTCTTATT-3'      |
| Reverse   | 5'-CCGCAGATTCAGAGCATTGTC-3'       |
| dkk1b     |                                   |
| Forward   | 5'-TCGCCCATGAAAACCTACTG-3'        |
| Reverse   | 5'-TGGACCAAAGTGACGAGC-3'          |
| efl       |                                   |
| Forward   | 5'-GGAAATTCGAGACCAGCAAATAC-3'     |
| Reverse   | 5'-GATACCAGCCTCAAACCTCACC-3'      |

---
